# Supplementary material for: Constructing vacancy-rich metal phosphates by the spatial effect of ionic oligomers for enhanced OER activity
Source: Royal Society of Chemistry journal article supplement (doi:10.1039/d4ta01706d), 2024-01-01
Supplement: d4ta01706d1.pdf [file d4ta01706d1.pdf]

## Supporting Information

### **Constructing vacancy-rich metal phosphates by the spatial effect of ionic oligomers for enhanced OER activity**

*Yida Zhao, Xinyu He, Xiaoming Ma, Zhengxi Guo, Menghui Qi, Zhaoming Liu\* and  
Ruikang Tang\**

Department of Chemistry, Zhejiang University, Hangzhou, Zhejiang 310058, China

E-mail: oldliu@zju.edu.cn, rtang@zju.edu.cn

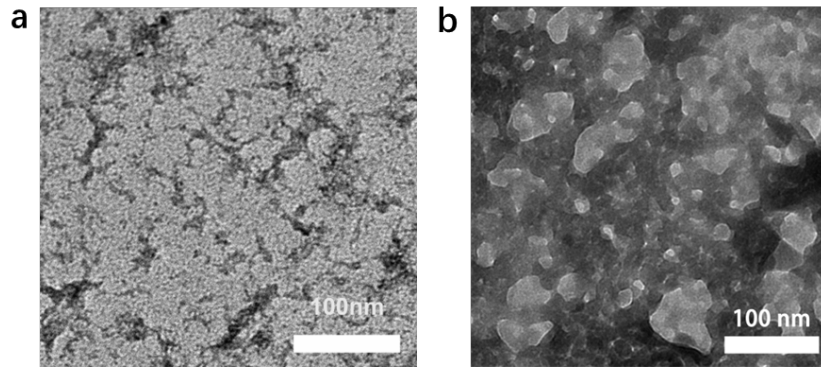

**Figure S1.** TEM image of A-Ni<sub>0.5</sub>Co<sub>0.5</sub>Pi during the synthesis process at different stages. (a) Branch-like structures and (b) porous structures during the process of crosslinking/polymerization.

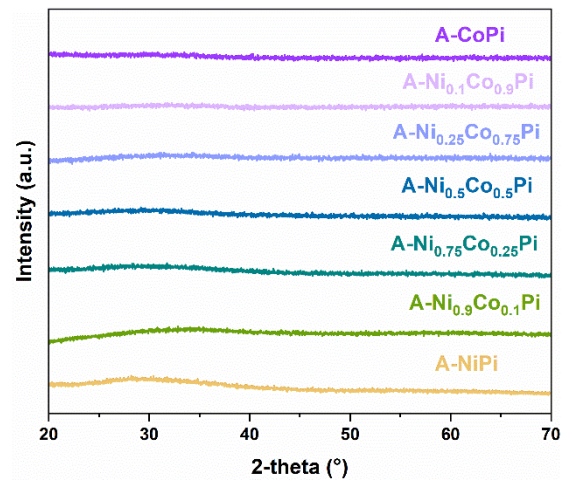

**Figure S2.** XRD curves of A-NiCoPi with different Ni/Co ratios.

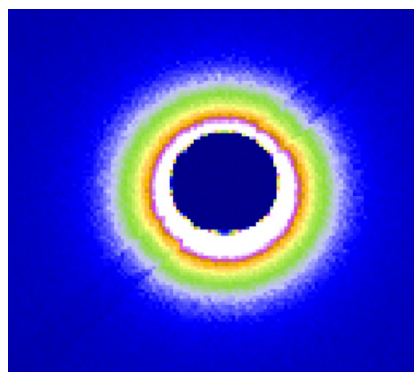

**Figure S3.** 2D SAXS image of A-Ni<sub>0.5</sub>Co<sub>0.5</sub>Pi.

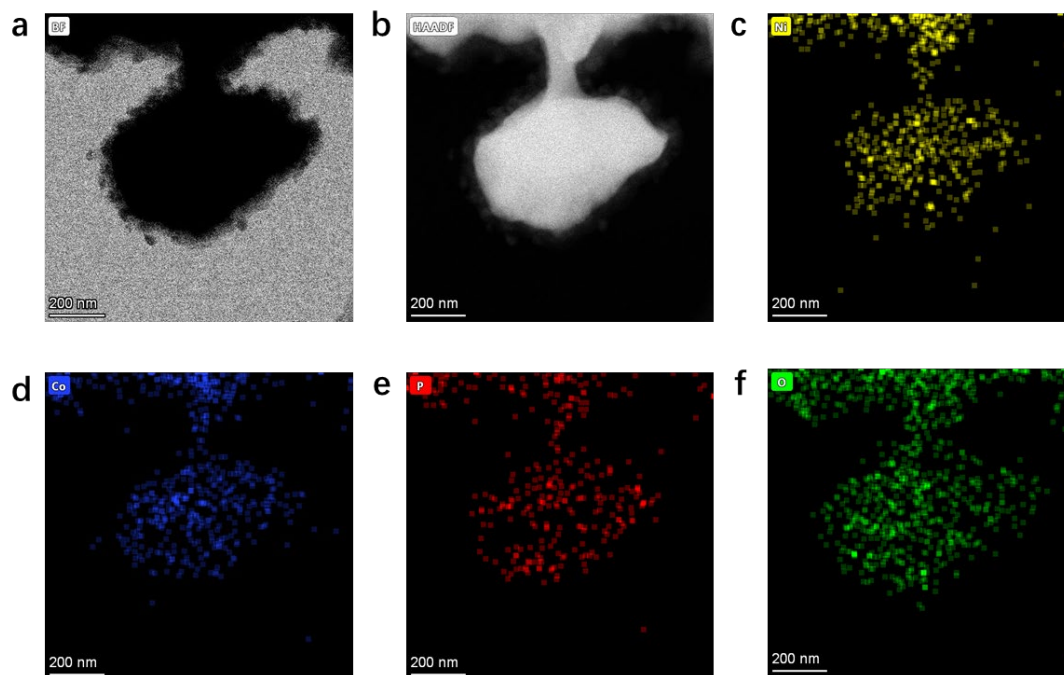

**Figure S4.** (a) HRTEM image, (b) HAADF-STEM image, (c)-(f) Element mapping of A-Ni<sub>0.5</sub>Co<sub>0.5</sub>Pi at large scale.

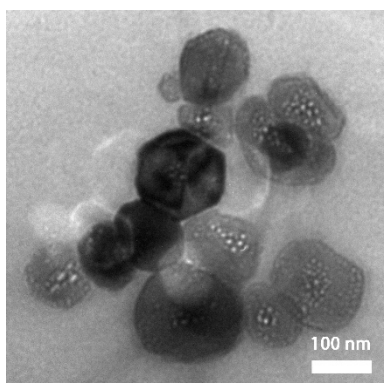

**Figure S5.** TEM image of C-Ni<sub>0.5</sub>Co<sub>0.5</sub>Pi.

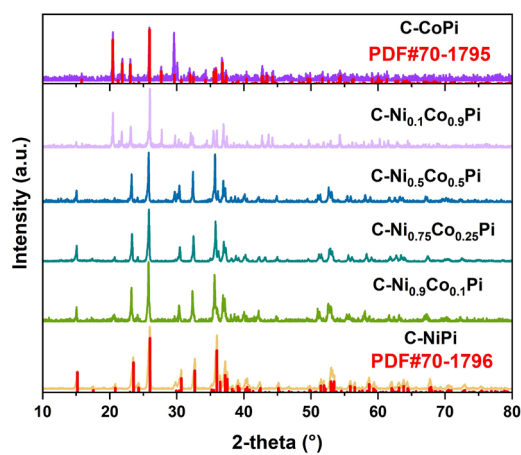

**Figure S6.** XRD curves of C-NiCoPi with different Ni/Co ratios.

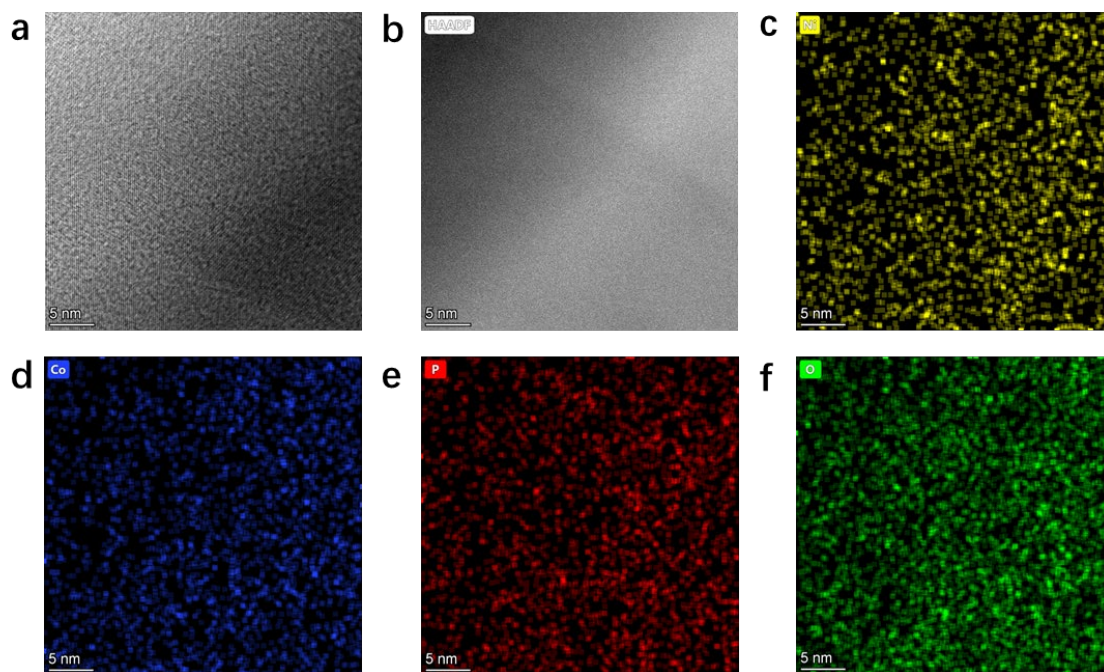

**Figure S7.** (a) HRTEM image, (b) HAADF-STEM image, (c)-(f) Element mapping of C-Ni<sub>0.5</sub>Co<sub>0.5</sub>Pi at nano scale.

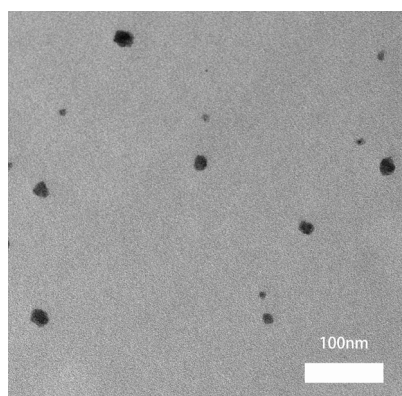

**Figure S8.** TEM image of N-Ni<sub>0.5</sub>Co<sub>0.5</sub>Pi.

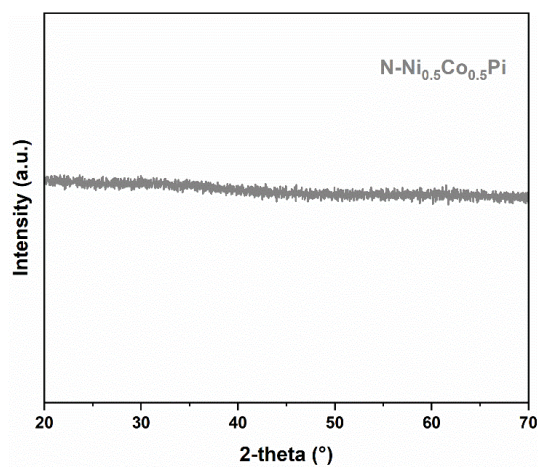

**Figure S9.** XRD curve of N-Ni<sub>0.5</sub>Co<sub>0.5</sub>Pi.

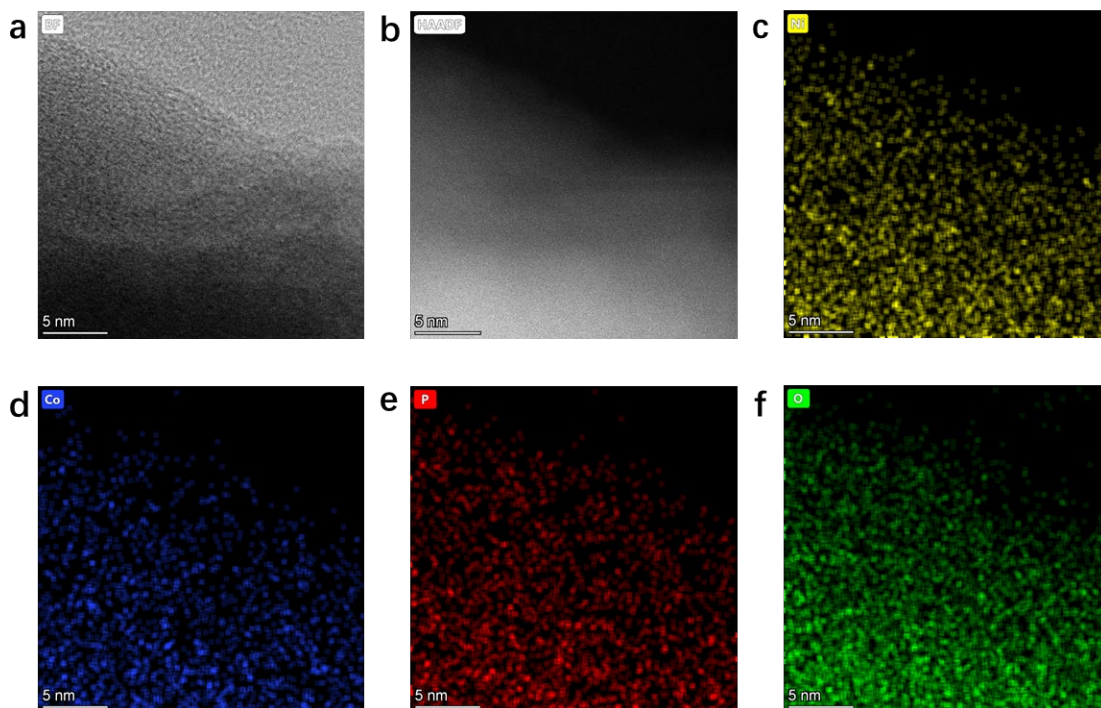

**Figure S10.** (a) HRTEM image, (b) HAADF-STEM image, (c)-(f) Element mapping of N-Ni<sub>0.5</sub>Co<sub>0.5</sub>Pi at nano scale.

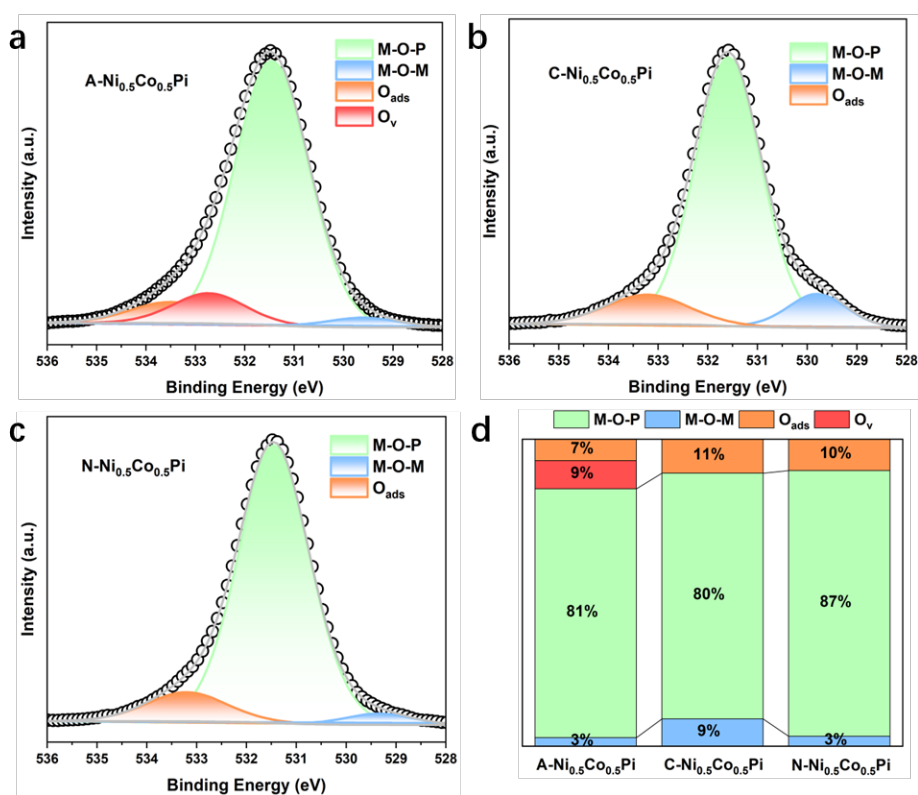

**Figure S11.** The O<sub>1s</sub> XPS spectra and the fitting results of (a) A-Ni<sub>0.5</sub>Co<sub>0.5</sub>Pi, (b) C-Ni<sub>0.5</sub>Co<sub>0.5</sub>Pi and (c) N-Ni<sub>0.5</sub>Co<sub>0.5</sub>Pi. (d) Corresponding contribution analysis.

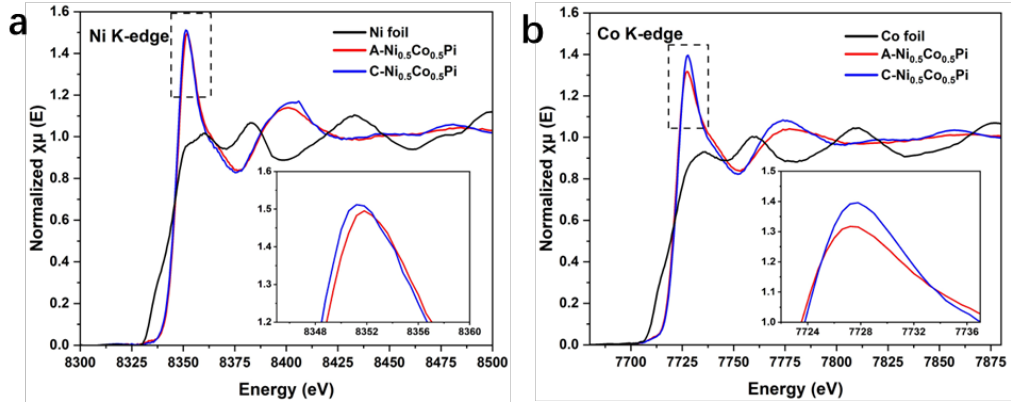

**Figure S12.** (a) Ni K-edge and (b) Co K-edge XANES spectra comparison of A-Ni<sub>0.5</sub>Co<sub>0.5</sub>Pi and C-Ni<sub>0.5</sub>Co<sub>0.5</sub>Pi.

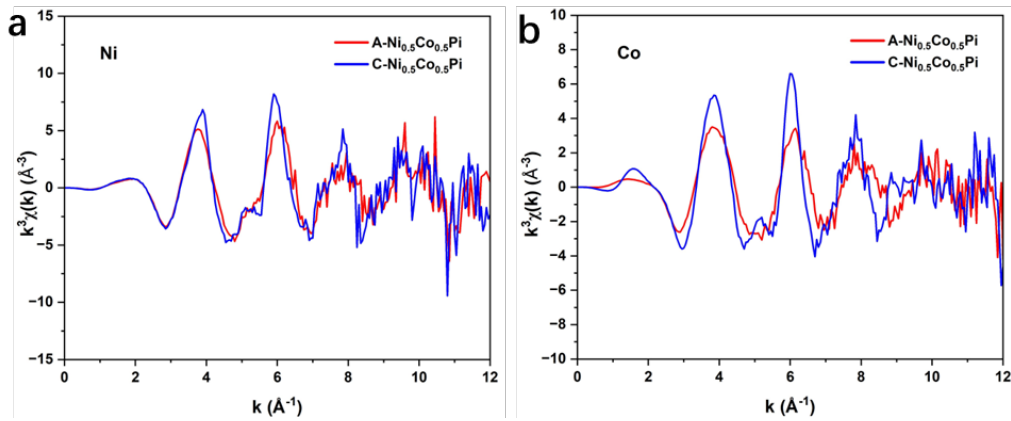

**Figure S13.** (a) Ni K-edge and (b) Co K-edge EXAFS oscillations comparison of A-Ni<sub>0.5</sub>Co<sub>0.5</sub>Pi and C-Ni<sub>0.5</sub>Co<sub>0.5</sub>Pi in k space.

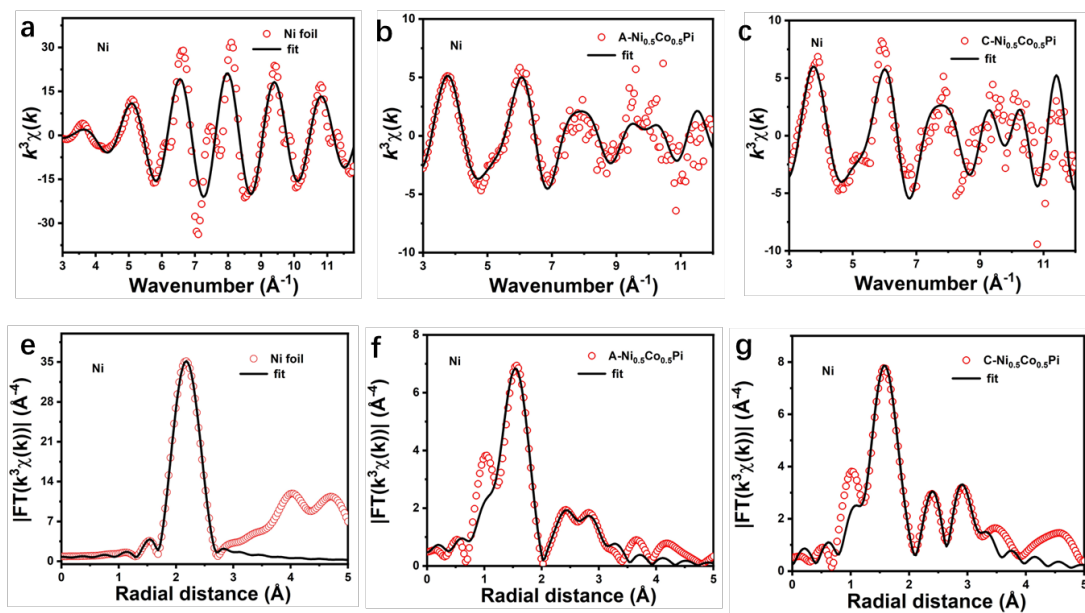

**Figure S14.** Ni K-edge EXAFS oscillation functions  $k^3\chi(k)$  and fitting of (a) Ni foil,

(b) A-Ni<sub>0.5</sub>Co<sub>0.5</sub>Pi, and (c) C-Ni<sub>0.5</sub>Co<sub>0.5</sub>Pi. The  $k^3$ -weighted FT spectra and fitting in R-space at the Ni K-edge of (d) Ni foil, (e) A-Ni<sub>0.5</sub>Co<sub>0.5</sub>Pi, and (f) C-Ni<sub>0.5</sub>Co<sub>0.5</sub>Pi.

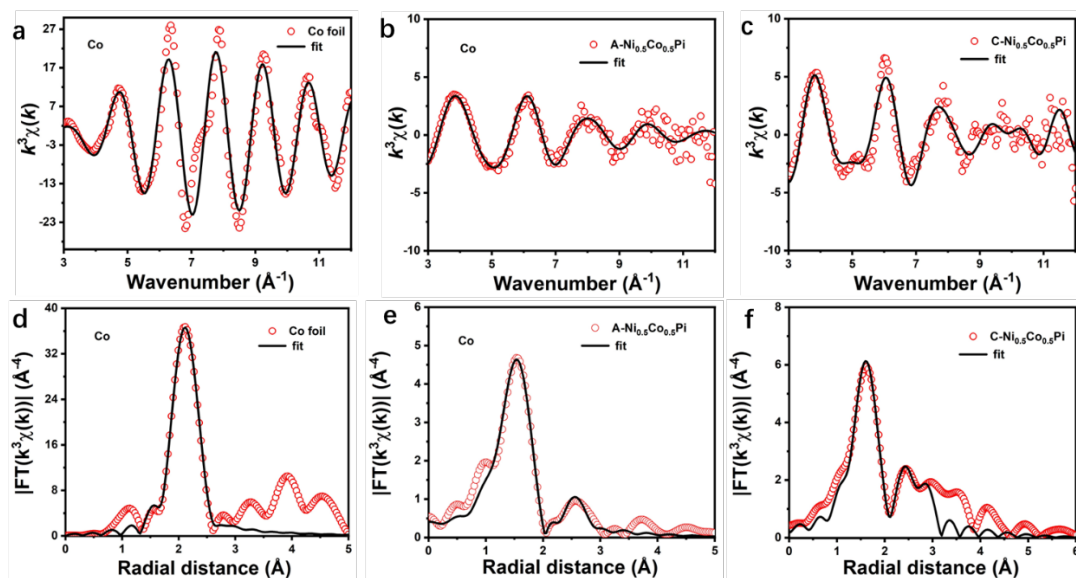

**Figure S15.** Co K-edge EXAFS oscillation functions  $k^3\chi(k)$  and fitting of (a) Co foil, (b) A-Ni<sub>0.5</sub>Co<sub>0.5</sub>Pi, and (c) C-Ni<sub>0.5</sub>Co<sub>0.5</sub>Pi. The  $k^3$ -weighted FT spectra and fitting in R-space at the Ni K-edge of (d) Co foil, (e) A-Ni<sub>0.5</sub>Co<sub>0.5</sub>Pi, and (f) C-Ni<sub>0.5</sub>Co<sub>0.5</sub>Pi.

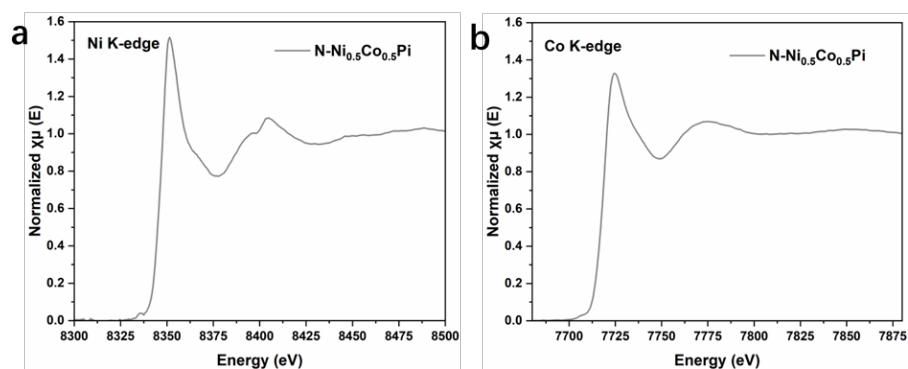

**Figure S16.** (a) Ni K-edge and (b) Co K-edge XANES spectra of N-Ni<sub>0.5</sub>Co<sub>0.5</sub>Pi.

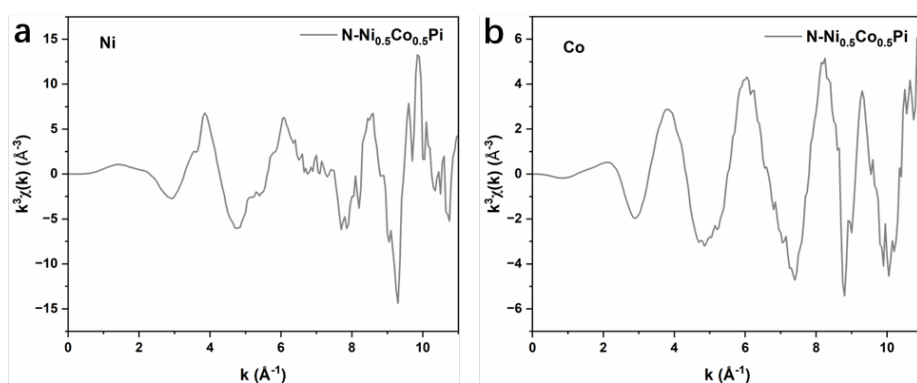

**Figure S17.** (a) Ni K-edge and (b) Co K-edge EXAFS oscillations of N-Ni<sub>0.5</sub>Co<sub>0.5</sub>Pi in  $k$  space.

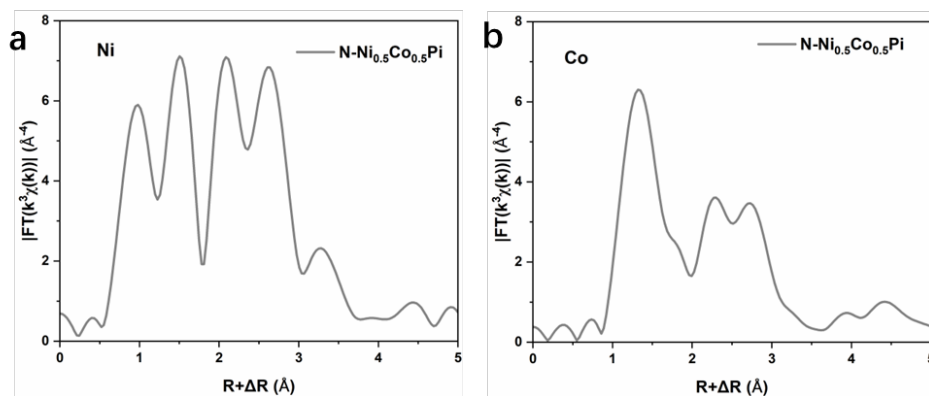

**Figure S18.** FT curves of the (a) Ni K-edge and (b) Co K-edge EXAFS functions in R-space of N-Ni<sub>0.5</sub>Co<sub>0.5</sub>Pi.

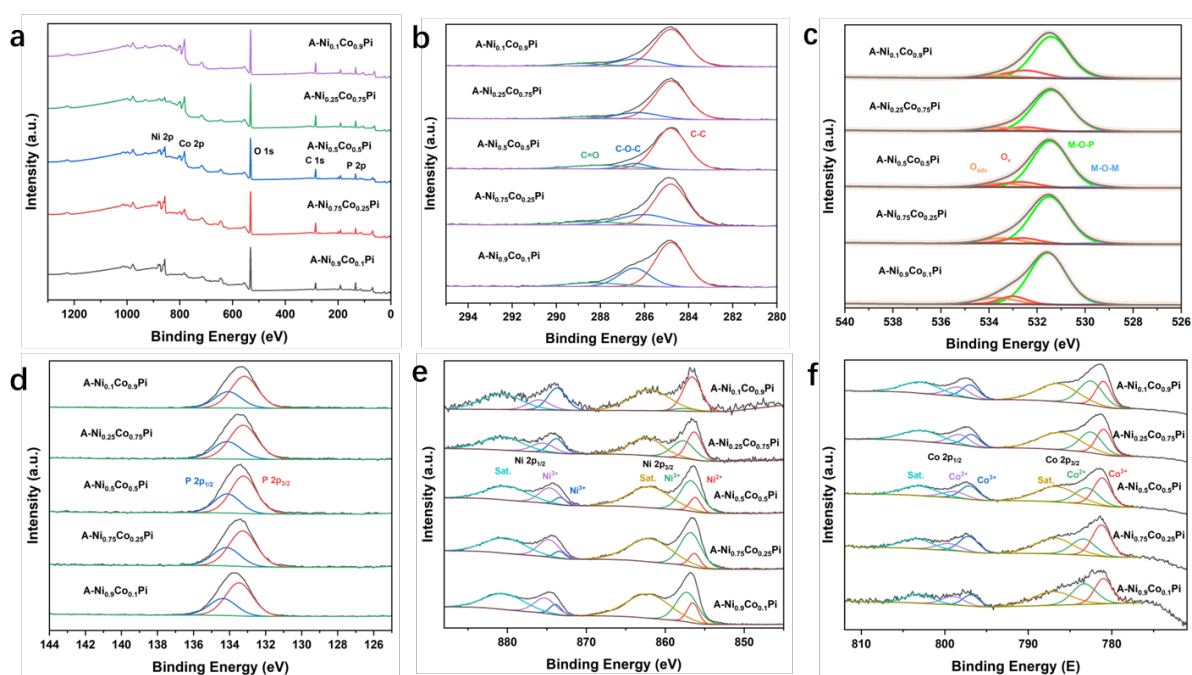

**Figure S19.** (a) The XPS survey, high-resolution XPS spectra of (b) C 1s, (c) O 1s, (d) P 2p, (e) Ni 2p and (f) Co 2p of A-NiCoPi. The spectra distinctly showcase spin-orbit splitting peaks for Ni and Co. Accompanying satellite peaks are also observed. Peaks appearing at 133.5 eV and 134.4 eV are ascribed to the 2p<sub>3/2</sub> and 2p<sub>1/2</sub> levels of P<sup>5+</sup>, respectively.



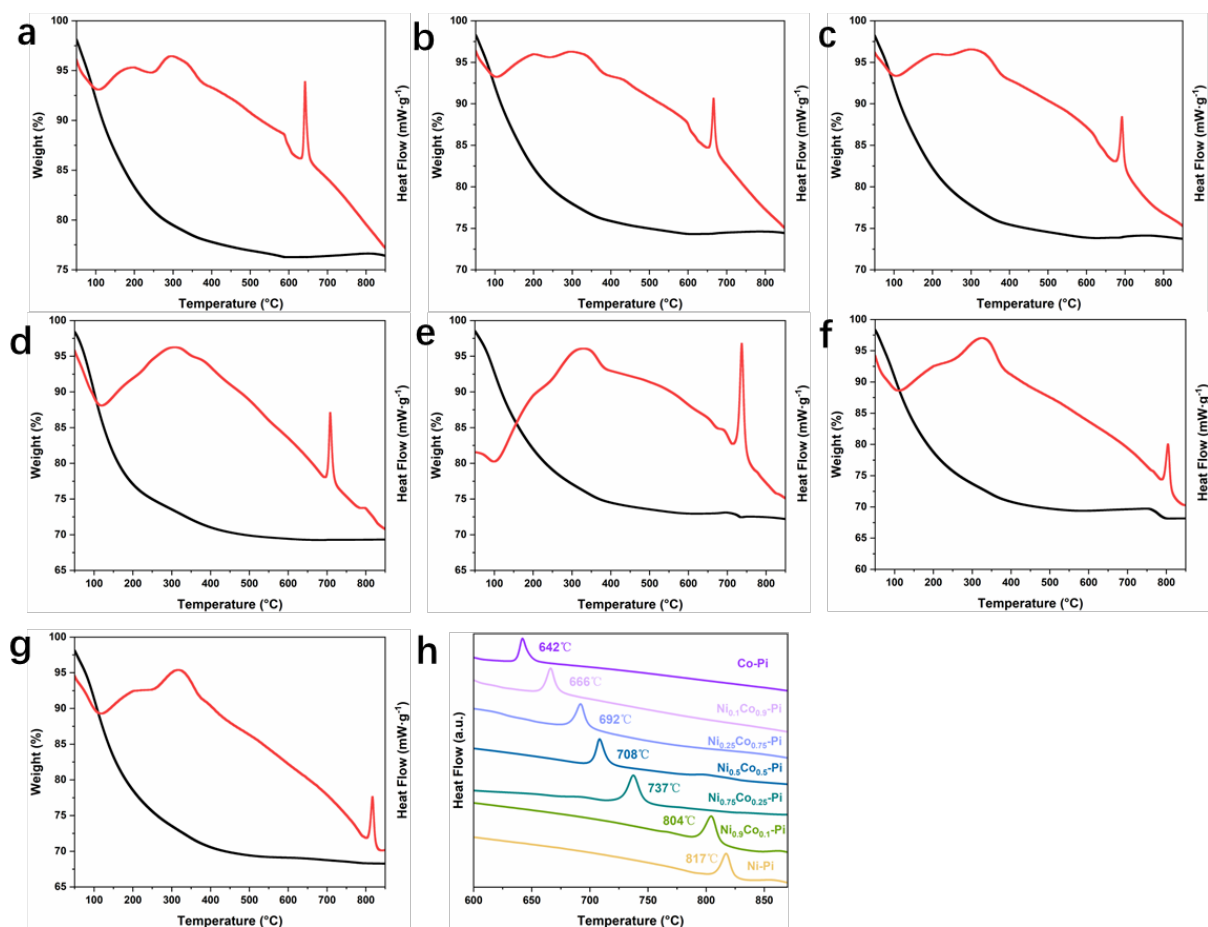

**Figure S20.** TG/DSC curves of (a) A-CoPi, (b) A-Ni<sub>0.1</sub>Co<sub>0.9</sub>Pi, (c) A-Ni<sub>0.25</sub>Co<sub>0.75</sub>Pi, (d) A-Ni<sub>0.5</sub>Co<sub>0.5</sub>Pi, (e) A-Ni<sub>0.75</sub>Co<sub>0.25</sub>Pi, (f) A-Ni<sub>0.9</sub>Co<sub>0.1</sub>Pi and (g) A-NiPi. (h) DSC curves of A-NiCoPi with different Ni/Co ratios. The crystallization behavior of amorphous materials can reflect their composition and structural information, and multi-stage exothermic crystallization processes are often a characteristic of phase separation. Thermogravimetric/differential scanning calorimetry (TG/DSC) analysis shows that the crystallization peaks of amorphous nickel phosphate (A-NiPi) and amorphous cobalt phosphate (A-CoPi) occur at 817°C and 642°C, respectively. A-NiCoPi with different Ni/Co ratios exhibit only a single crystallization peak, indicating that their structure is different from simple mixtures and is more homogeneous, resembling the properties of single-phase compounds.

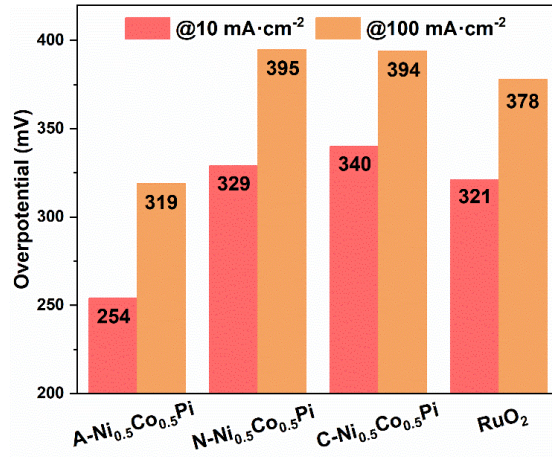

**Figure S21.** Overpotential comparison of A-Ni<sub>0.5</sub>Co<sub>0.5</sub>Pi, N-Ni<sub>0.5</sub>Co<sub>0.5</sub>Pi, C-Ni<sub>0.5</sub>Co<sub>0.5</sub>Pi and RuO<sub>2</sub> at 10mA·cm<sup>-2</sup> and 100mA·cm<sup>-2</sup>.

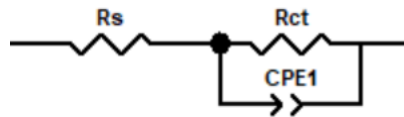

**Figure S22.** Equivalent circuit model of EIS fitting.

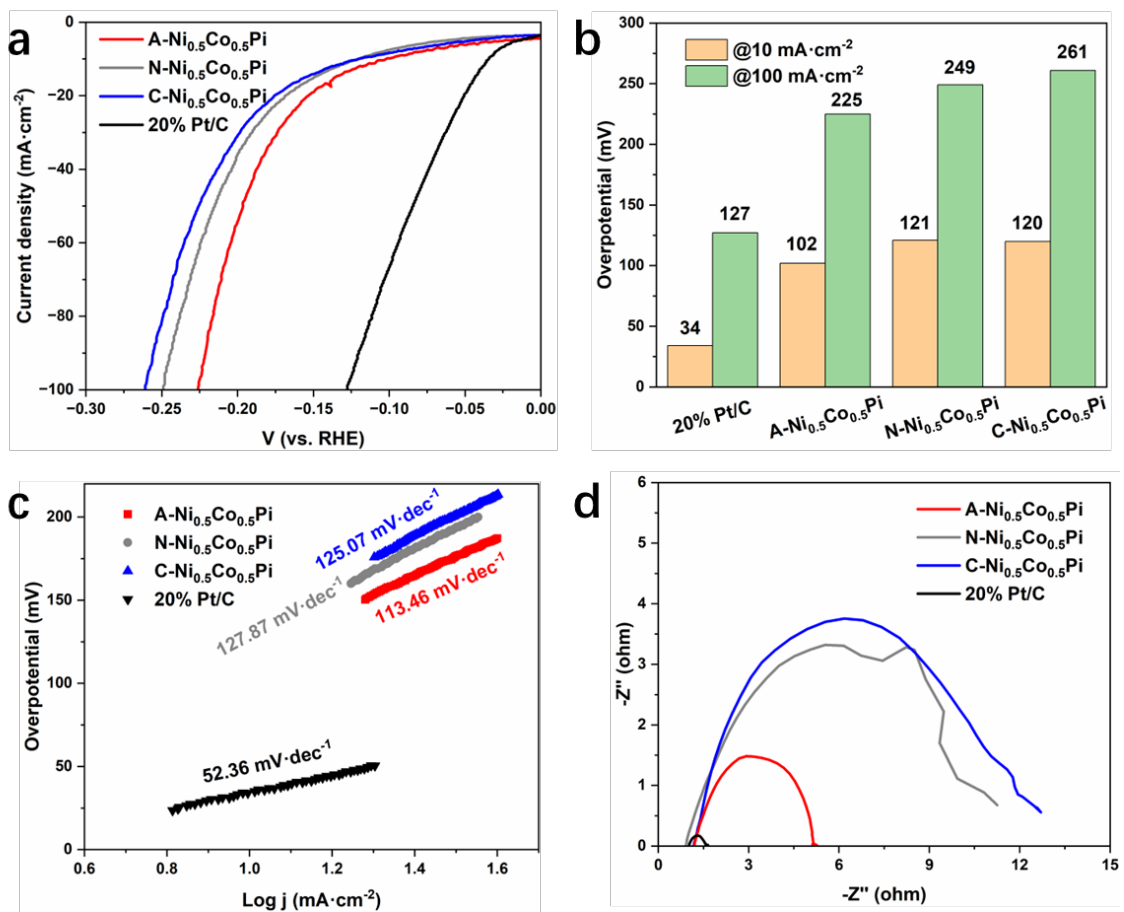

**Figure S23.** The HER performance of A-Ni<sub>0.5</sub>Co<sub>0.5</sub>Pi, N-Ni<sub>0.5</sub>Co<sub>0.5</sub>Pi, C-Ni<sub>0.5</sub>Co<sub>0.5</sub>Pi and 20% Pt/C in 1 M KOH. (a) iR-corrected LSV curves of and (b) corresponding Tafel plots. (c) EIS curves at 100 mV overpotential.

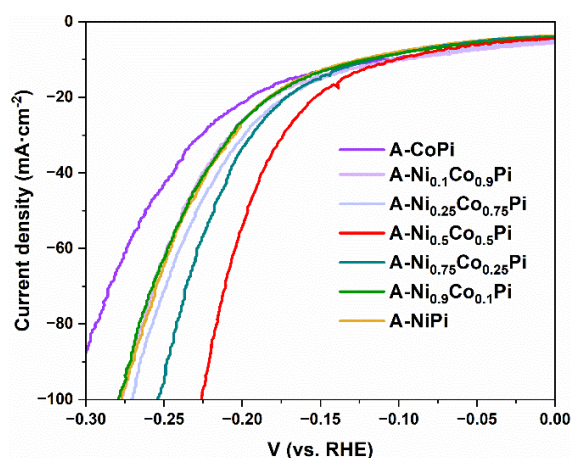

**Figure S24.** iR-corrected LSV curves of A-NiCoPis' HER performance.

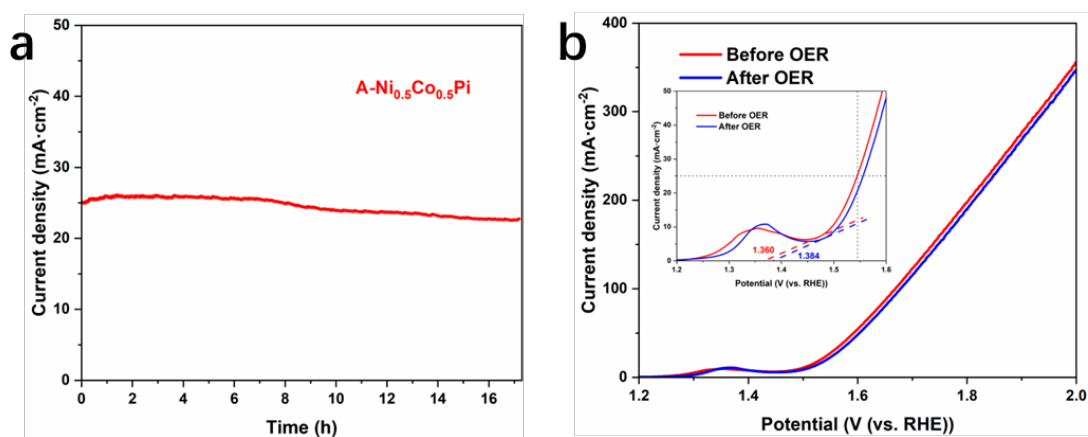

**Figure S25.** (a) The chronopotentiometry curve of A-Ni<sub>0.5</sub>Co<sub>0.5</sub>Pi in 1 M KOH electrolyte at small current density. Average attenuation ratio per hour was 0.6%. (b) Comparison of LSV curves of A-Ni<sub>0.5</sub>Co<sub>0.5</sub>Pi before and after stability test.

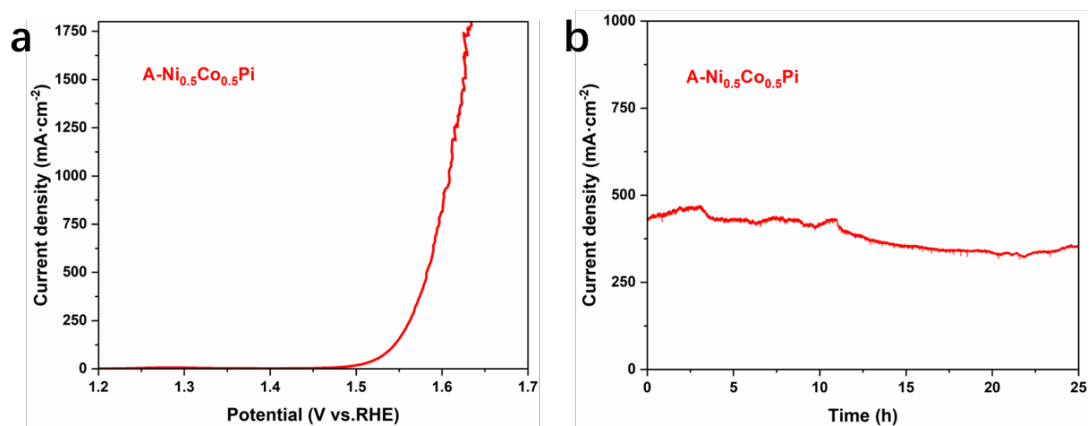

**Figure S26.** (a) iR-corrected LSV curve and (b) chronopotentiometry curve of

A-Ni<sub>0.5</sub>Co<sub>0.5</sub>Pi in 1 M KOH electrolyte under large current density.

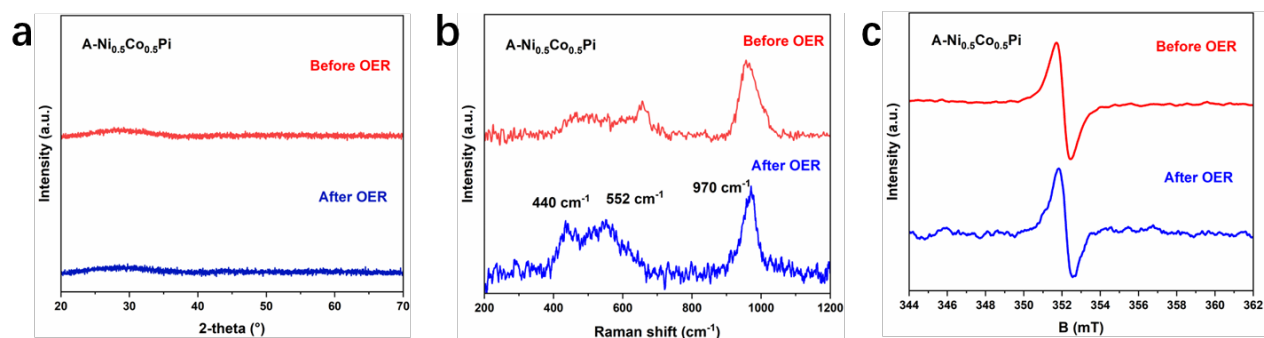

**Figure S27.** Post stability test of A-Ni<sub>0.5</sub>Co<sub>0.5</sub>Pi after stability test. (a) XRD, (b) Raman and (c) EPR spectra.

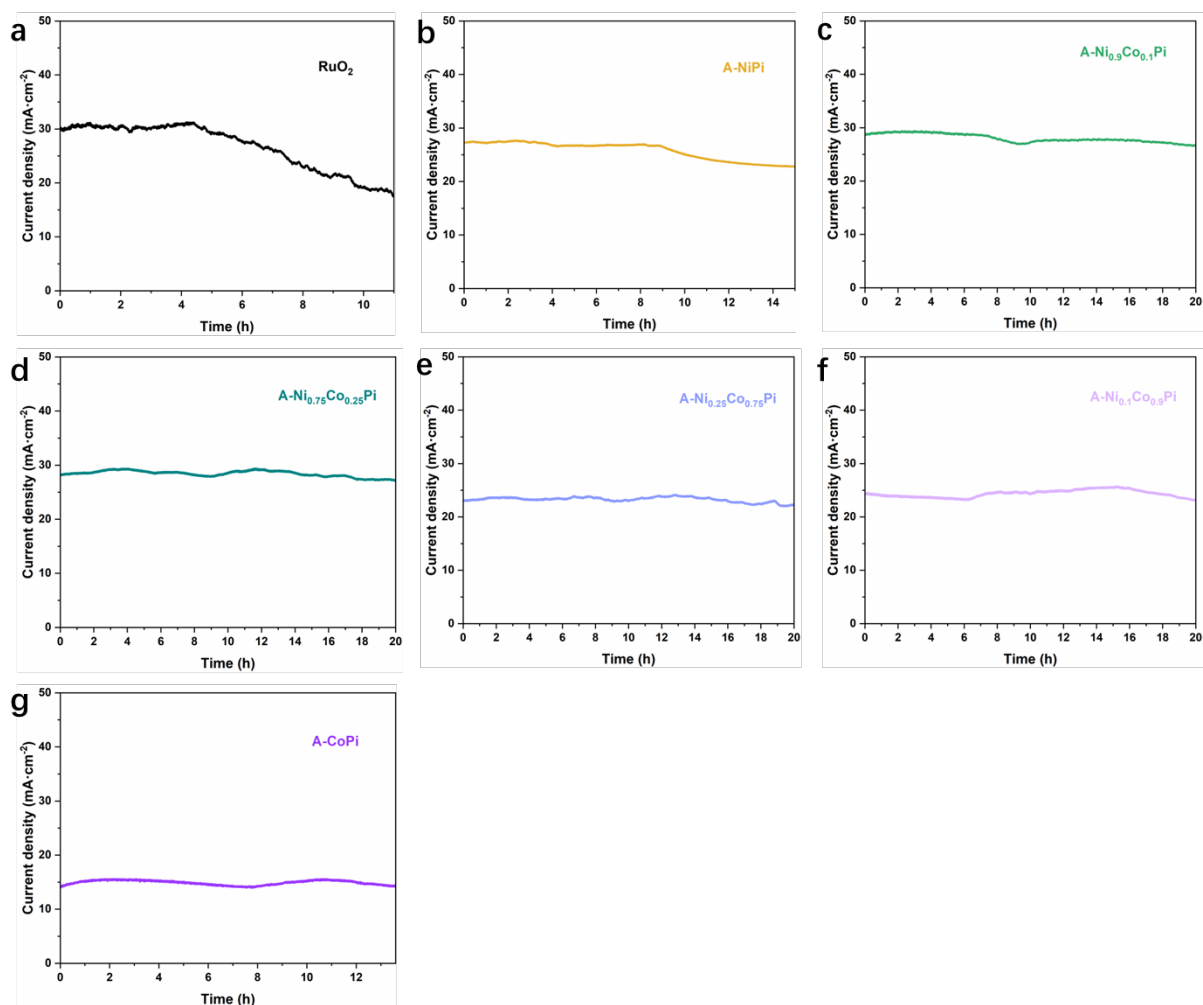

**Figure S28.** The chronopotentiometry curve of (a) RuO<sub>2</sub>, (b) A-NiPi, (c) A-Ni<sub>0.9</sub>Co<sub>0.1</sub>Pi, (d) A-Ni<sub>0.75</sub>Co<sub>0.25</sub>Pi, (e) A-Ni<sub>0.25</sub>Co<sub>0.75</sub>Pi, (f) A-Ni<sub>0.1</sub>Co<sub>0.9</sub>Pi and (g) A-CoPi in 1 M KOH electrolyte. The slight fluctuations in the i-t curves are attributed to temperature changes.

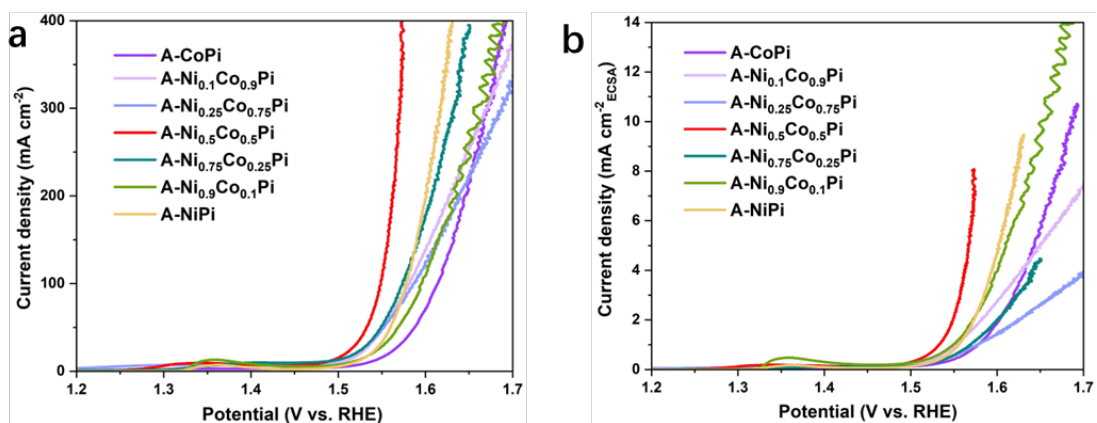

**Figure S29.** (a) iR-corrected LSV curves and (b) LSV curves normalized by ECSA of A-NiCoPi.

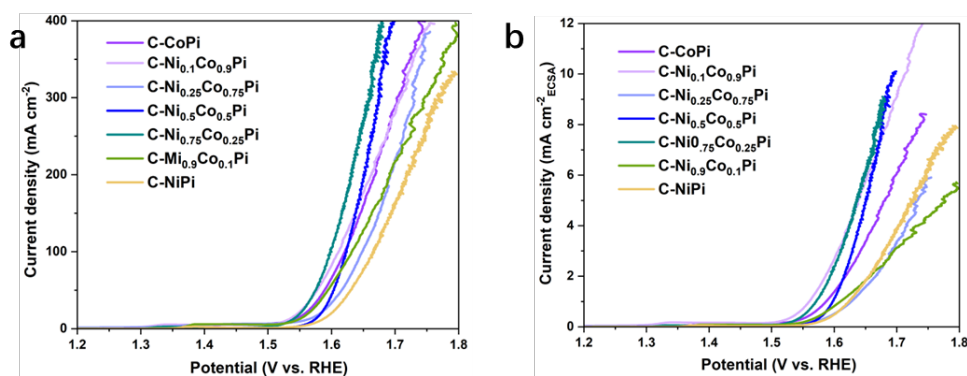

**Figure S30.** (a) iR-corrected LSV curves and (b) LSV curves normalized by ECSA of C-NiCoPi.

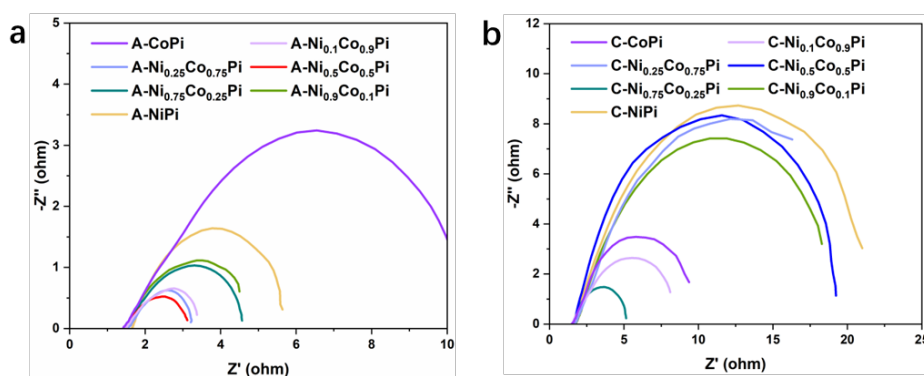

**Figure S31.** EIS curves of (a) A-NiCoPi and (b) C-NiCoPi.

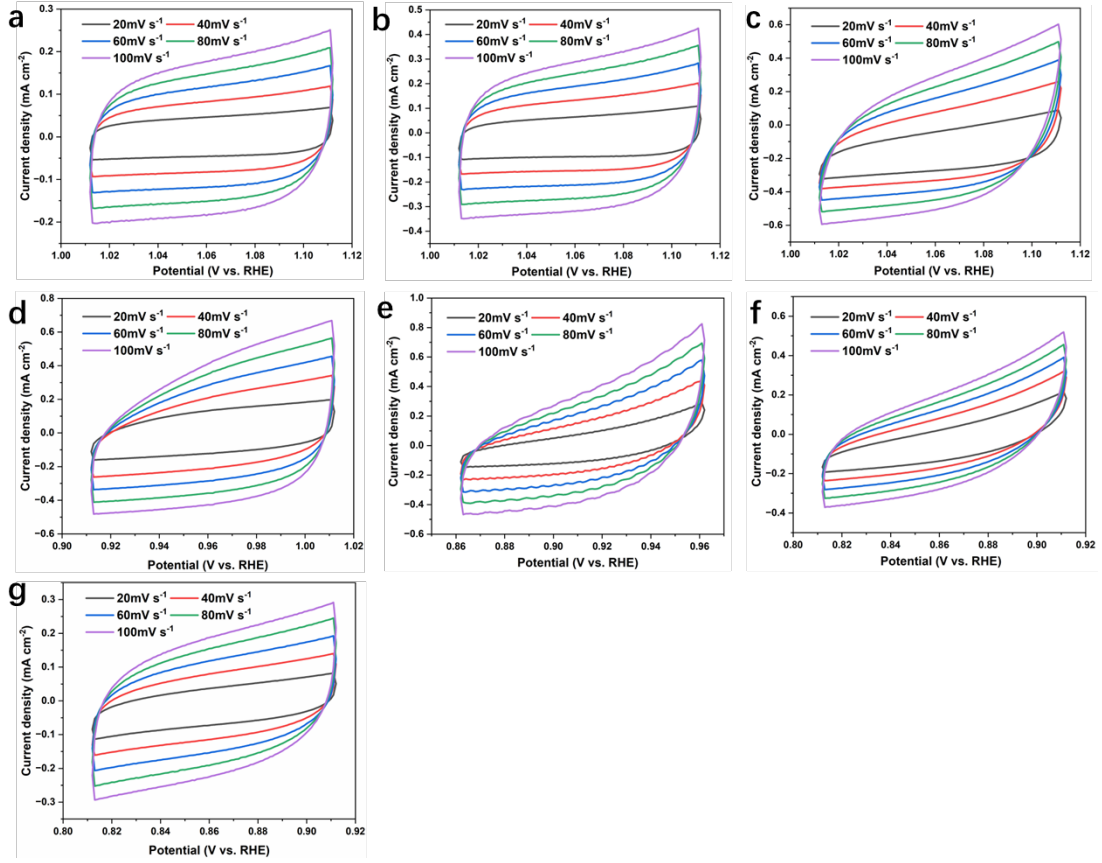

**Figure S32.** CV curves with different scan rates of (a) A-NiPi, (b) A-Ni<sub>0.9</sub>Co<sub>0.1</sub>Pi, (c) A-Ni<sub>0.75</sub>Co<sub>0.25</sub>Pi, (d) A-Ni<sub>0.5</sub>Co<sub>0.5</sub>Pi, (e) A-Ni<sub>0.25</sub>Co<sub>0.75</sub>Pi, (f) A-Ni<sub>0.1</sub>Co<sub>0.9</sub>Pi, (g) A-CoPi.

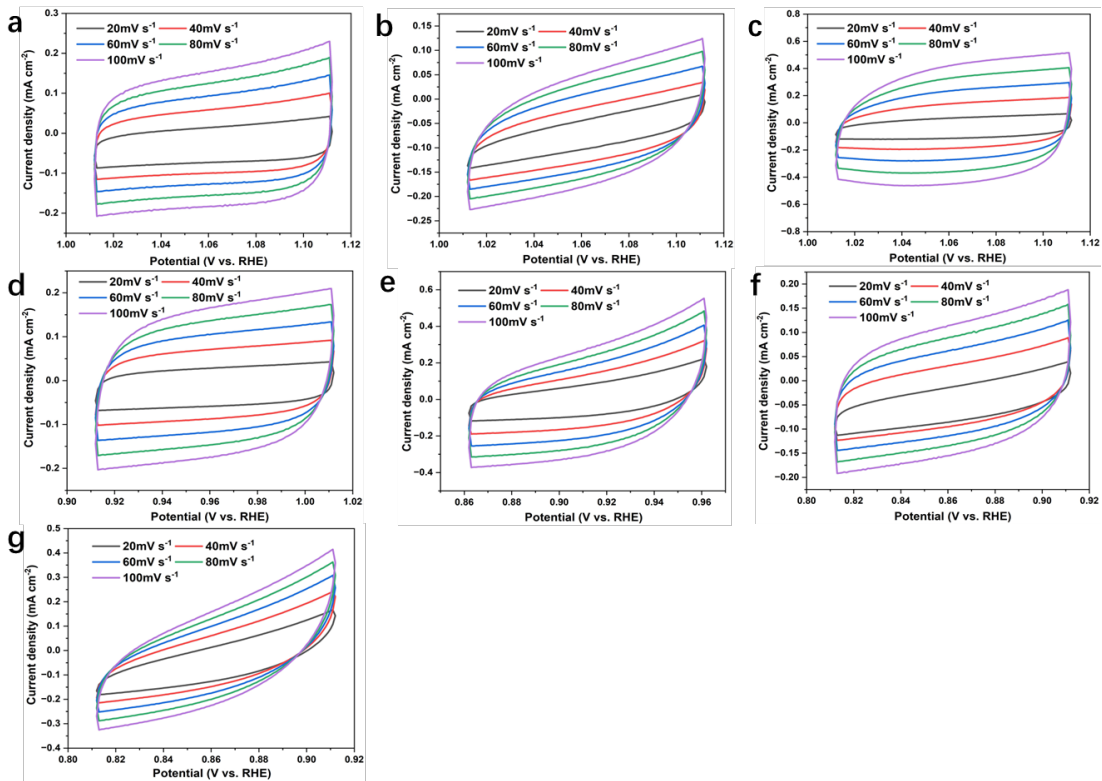

**Figure S33.** CV curves with different scan rates of (a) C-NiPi, (b) C-Ni<sub>0.9</sub>Co<sub>0.1</sub>Pi, (c) C-Ni<sub>0.75</sub>Co<sub>0.25</sub>Pi, (d) C-Ni<sub>0.5</sub>Co<sub>0.5</sub>Pi, (e) C-Ni<sub>0.25</sub>Co<sub>0.75</sub>Pi, (f) C-Ni<sub>0.1</sub>Co<sub>0.9</sub>Pi, (g) C-CoPi.

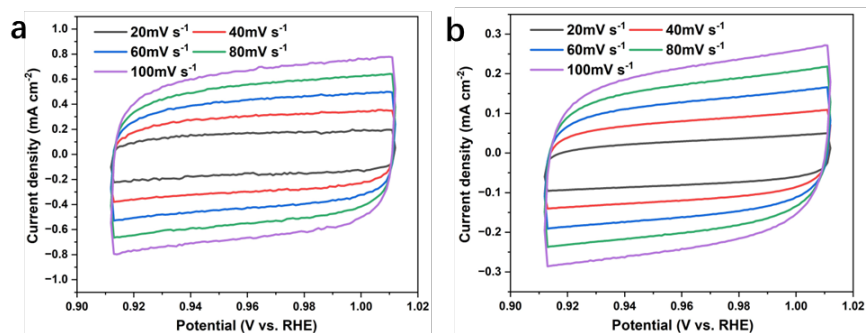

**Figure S34.** CV curves with different scan rates of (a) RuO<sub>2</sub> and (b) N-Ni<sub>0.5</sub>Co<sub>0.5</sub>Pi.

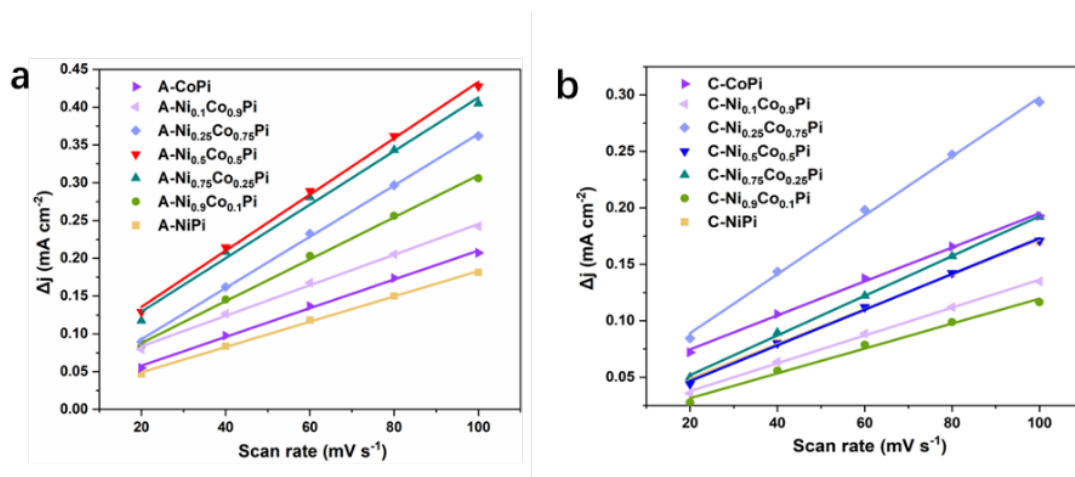

**Figure S35.** The capacitive current-scan rate plots of (a) A-NiCoPi and (b) C-NiCoPi.

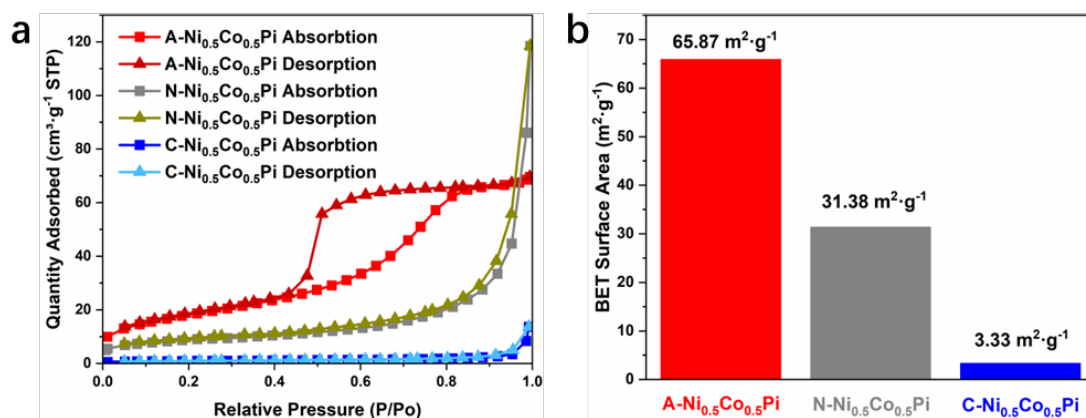

**Figure S36.** (a) N<sub>2</sub> adsorption/desorption isotherms and (b) the fitted BET Surface Area of A-Ni<sub>0.5</sub>Co<sub>0.5</sub>Pi, N-Ni<sub>0.5</sub>Co<sub>0.5</sub>Pi, and C-Ni<sub>0.5</sub>Co<sub>0.5</sub>Pi.

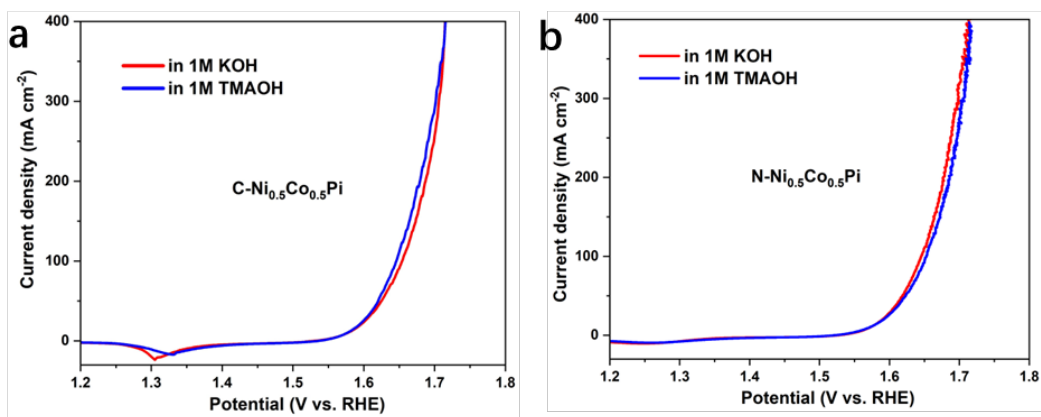

**Figure S37.** LSV curves of (a) C-Ni<sub>0.5</sub>Co<sub>0.5</sub>Pi and (b) N-Ni<sub>0.5</sub>Co<sub>0.5</sub>Pi in 1 m KOH and 1 m TMAOH electrolyte.

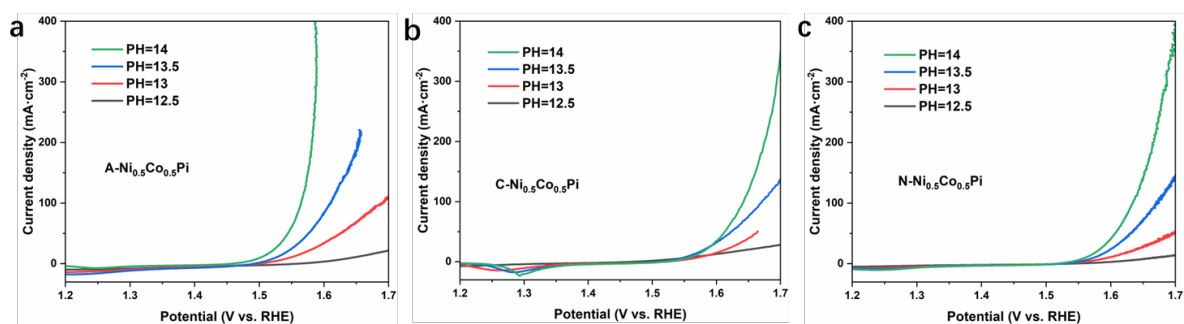

**Figure S38.** Polarization curves of (a) A-Ni<sub>0.5</sub>Co<sub>0.5</sub>Pi, (b) C-Ni<sub>0.5</sub>Co<sub>0.5</sub>Pi and (c) N-Ni<sub>0.5</sub>Co<sub>0.5</sub>Pi in KOH electrolyte with different pH value.

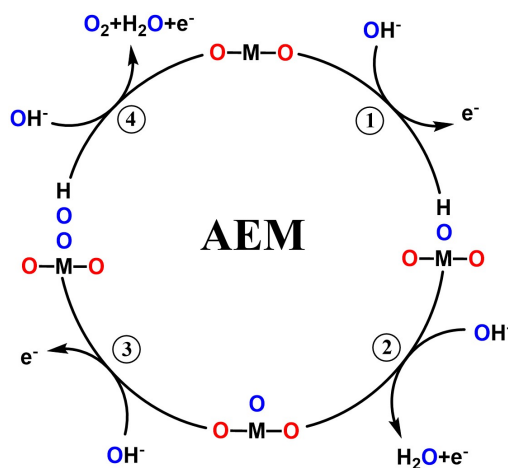

**Figure S39.** Traditional AEM pathway involving concerted proton–electron transfers on surface metal sites.



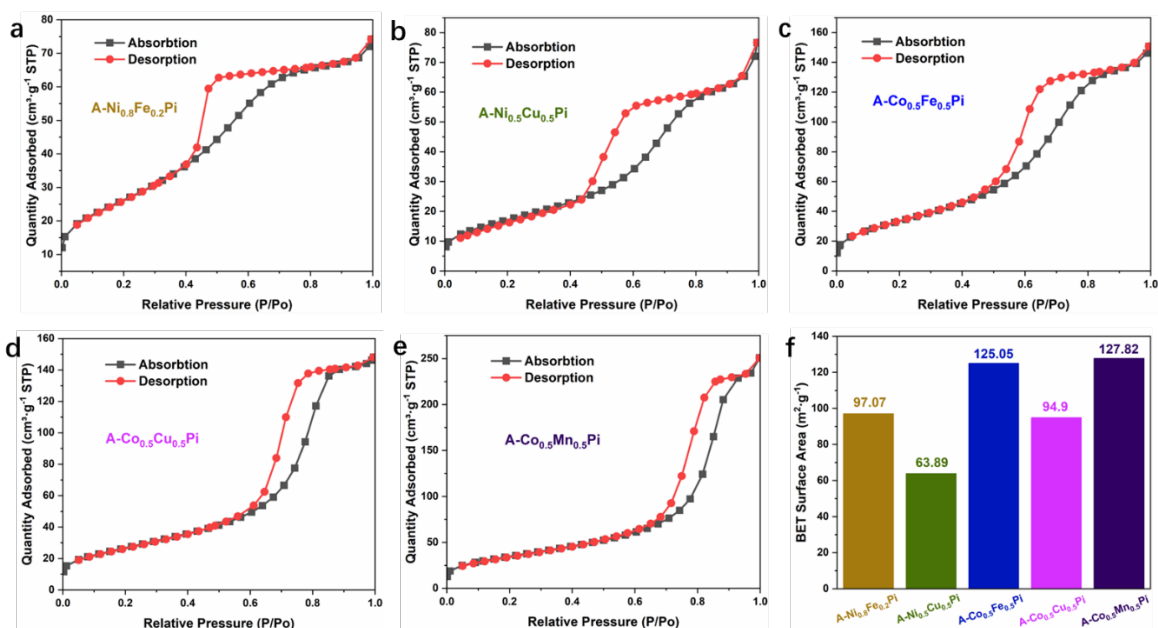

**Figure S40.** N<sub>2</sub> adsorption/desorption isotherms and (b) the fitted BET Surface Area of A-Ni<sub>0.8</sub>Fe<sub>0.2</sub>Pi, A-Ni<sub>0.5</sub>Cu<sub>0.5</sub>Pi, A-Co<sub>0.5</sub>Fe<sub>0.5</sub>Pi, A-Co<sub>0.5</sub>Cu<sub>0.5</sub>Pi, and C-Co<sub>0.5</sub>Mn<sub>0.5</sub>Pi.

**Table S1.** ICP-AES results of A-NiCoPi with different Ni/Co ratio.

| Sample                                     | Feed Ni/Co ratio | Ni content<br>(mg·L <sup>-1</sup> ) | Co content (mg·L <sup>-1</sup> ) | Real Ni/Co ratio |
|--------------------------------------------|------------------|-------------------------------------|----------------------------------|------------------|
| A-Ni <sub>0.9</sub> Co <sub>0.1</sub> Pi   | 9:1              | 339.7                               | 40.2                             | 8.48:1           |
| A-Ni <sub>0.75</sub> Co <sub>0.25</sub> Pi | 3:1              | 545.6                               | 188.1                            | 2.91:1           |
| A-Ni <sub>0.5</sub> Co <sub>0.5</sub> Pi   | 1:1              | 317.3                               | 327.9                            | 0.97:1           |
| A-Ni <sub>0.25</sub> Co <sub>0.75</sub> Pi | 1:3              | 312.2                               | 951.7                            | 1:3.04           |
| A-Ni <sub>0.1</sub> Co <sub>0.9</sub> Pi   | 1:9              | 28.6                                | 263.1                            | 1:8.38           |
| N-Ni <sub>0.5</sub> Co <sub>0.5</sub> Pi   | 92:8             | 31.8                                | 30.4                             | 1.05:1           |

**Table S2.** EXAFS fitting parameters at the Co *K*-edge and Ni *K*-edge for various samples. ( $S_0^2=1.0$ )

| Sample                                   | Path      | <i>N</i> <sup>a</sup> | <i>R</i> (Å) <sup>b</sup> | $\sigma^2$ (Å <sup>2</sup> ) <sup>c</sup> | $\Delta E_0$ (eV) <sup>d</sup> | <i>R</i> factor |
|------------------------------------------|-----------|-----------------------|---------------------------|-------------------------------------------|--------------------------------|-----------------|
| Co <i>k</i> -edge                        |           |                       |                           |                                           |                                |                 |
| Co foil                                  | Co-Co     | 12.00                 | 2.49<br>(+/-0.01)         | 0.0062<br>(+/-0.0010)                     | -6.58<br>(+/-3.05)             | 0.0097          |
|                                          | Co-O      | 5.59                  | 2.04<br>(+/-0.02)         | 0.0052<br>(+/-0.0018)                     | -2.04<br>(+/-0.29)             |                 |
| A-Ni <sub>0.5</sub> Co <sub>0.5</sub> Pi | Co -P     | 1.13                  | 2.86<br>(+/-0.03)         | 0.0072<br>(+/-0.0009)                     | 9.71<br>(+/-1.06)              | 0.0044          |
|                                          | Co -Ni/Co | 2.11                  | 3.33<br>(+/-0.02)         | 0.0031<br>(+/-0.0015)                     | 3.28<br>(+/-0.33)              |                 |
| C-Ni <sub>0.5</sub> Co <sub>0.5</sub> Pi | Co-O      | 5.96                  | 2.09<br>(+/-0.02)         | 0.0107<br>(+/-0.0009)                     | 2.68<br>(+/-1.61)              | 0.0032          |
|                                          | Co -P     | 1.23                  | 2.79<br>(+/-0.03)         | 0.0048<br>(+/-0.0002)                     | 9.57<br>(+/-3.92)              |                 |
|                                          | Co -Ni/Co | 2.58                  | 3.20<br>(+/-0.03)         | 0.0035<br>(+/-0.0003)                     | 9.59<br>(+/-1.72)              |                 |

|                                          |          | Ni <i>k</i> -edge |                   |                       |                    |        |
|------------------------------------------|----------|-------------------|-------------------|-----------------------|--------------------|--------|
| Ni foil                                  | Ni-Ni    | 12.00             | 2.49<br>(+/-0.01) | 0.0062<br>(+/-0.0038) | 6.06<br>(+/-0.52)  | 0.0194 |
|                                          | Ni-O     | 5.61              | 2.04<br>(+/-0.02) | 0.0083<br>(+/-0.0016) | -5.10<br>(+/-3.99) |        |
| A-Ni <sub>0.5</sub> Co <sub>0.5</sub> Pi | Ni-P     | 0.88              | 2.81<br>(+/-0.02) | 0.0036<br>(+/-0.0008) | 3.23<br>(+/-2.71)  | 0.0177 |
|                                          | Ni-Ni/Co | 0.91              | 3.17<br>(+/-0.04) | 0.0045<br>(+/-0.0006) | 9.11<br>(+/-3.77)  |        |
|                                          | Ni-O     | 6.17              | 2.07<br>(+/-0.02) | 0.0080<br>(+/-0.0013) | -6.61<br>(+/-2.93) |        |
| C-Ni <sub>0.5</sub> Co <sub>0.5</sub> Pi | Ni-P     | 1.15              | 2.82<br>(+/-0.02) | 0.0082<br>(+/-0.0008) | 4.43<br>(+/-1.98)  | 0.0095 |
|                                          | Ni-Ni/Co | 1.00              | 3.18<br>(+/-0.03) | 0.0070<br>(+/-0.0005) | 6.74<br>(+/-3.27)  |        |

<sup>a</sup>CN, coordination number; <sup>b</sup>*R*, distance between absorber and backscatter atoms; <sup>c</sup> $\sigma^2$ , Debye-Waller factor to account for both thermal and structural disorders; <sup>d</sup> $\Delta E_0$ , inner potential correction; *R* factor indicates the goodness of the fit. According to the experimental EXAFS fit of Co foil and Ni foil by fixing CN as the known crystallographic value. Fitting range:  $3.0 \leq k$  ( $\text{\AA}^{-1}$ )  $\leq 12.5$  and  $1.0 \leq R$  ( $\text{\AA}$ )  $\leq 3.0$  (Co foil);  $3.0 \leq k$  ( $\text{\AA}^{-1}$ )  $\leq 11.8$  and  $1.0 \leq R$  ( $\text{\AA}$ )  $\leq 3.0$  (Ni foil);  $3.0 \leq k$  ( $\text{\AA}^{-1}$ )  $\leq 10.7$  and  $1.0 \leq R$  ( $\text{\AA}$ )  $\leq 3.0$  (Sample-A-Co) ;  $3.0 \leq k$  ( $\text{\AA}^{-1}$ )  $\leq 11.0$  and  $1.0 \leq R$  ( $\text{\AA}$ )  $\leq 3.0$  (Sample-A-Ni) ;  $3.0 \leq k$  ( $\text{\AA}^{-1}$ )  $\leq 11.0$  and  $1.0 \leq R$  ( $\text{\AA}$ )  $\leq 3.0$  (Sample-C-Co) ;  $3.0 \leq k$  ( $\text{\AA}^{-1}$ )  $\leq 11.0$  and  $1.0 \leq R$  ( $\text{\AA}$ )  $\leq 3.0$  (Sample-C-Ni).

**Table S3.** Summary of catalytic performance of previously reported OER catalysts in alkaline electrolytes.

| Catalyst                              | $\eta@10 \text{ mA}\cdot\text{cm}^{-2}$ (mV) | Tafel slope (mV $\cdot\text{dec}^{-1}$ ) | Reference               |
|---------------------------------------|----------------------------------------------|------------------------------------------|-------------------------|
| NPO                                   | 380                                          | 48                                       | Ref S1 <sup>[1]</sup>   |
| CoPO                                  | 350                                          | 60.7                                     | Ref S2 <sup>[2]</sup>   |
| CoPi                                  | 281                                          | 98                                       | Ref S3 <sup>[3]</sup>   |
| Co <sub>2</sub> Fe <sub>2</sub> -NiPi | 300                                          | 55                                       | Ref S4 <sup>[4]</sup>   |
| NiCoPi                                | 320                                          | 44.5                                     | Ref S5 <sup>[5]</sup>   |
| NiCoPi                                | 310                                          | 68                                       | Ref S6 <sup>[6]</sup>   |
| NiCoHPO <sub>4</sub>                  | 320                                          | 84                                       | Ref S7 <sup>[7]</sup>   |
| CNPO                                  | 378                                          | 60.79                                    | Ref S8 <sup>[8]</sup>   |
| NiCoPi/Ni                             | 273                                          | 59.3                                     | Ref S9 <sup>[9]</sup>   |
| NiCoPi                                | 347                                          | 35                                       | Ref S10 <sup>[10]</sup> |
| NFP                                   | 330                                          | 50                                       | Ref S11 <sup>[11]</sup> |
| NiFePi/N-C                            | 280                                          | 48                                       | Ref S12 <sup>[12]</sup> |
| NiFePi                                | 240                                          | 45                                       | Ref S13 <sup>[13]</sup> |
| FeCoP/C                               | 282                                          | 53                                       | Ref S14 <sup>[14]</sup> |
| Co-FPOH                               | 290                                          | 69                                       | Ref S15 <sup>[15]</sup> |
| Co:FePi                               | 266                                          | 42.6                                     | Ref S16 <sup>[16]</sup> |

|                                           |     |       |                         |
|-------------------------------------------|-----|-------|-------------------------|
| Co-Fe-P-O                                 | 267 | 30    | Ref S17 <sup>[17]</sup> |
| CoNi-CuHP/NF                              | 299 | 88    | Ref S18 <sup>[18]</sup> |
| Co <sub>0.95</sub> Mn <sub>0.05</sub> -Pi | 335 | 84.08 | Ref S19 <sup>[19]</sup> |
| A-Ni <sub>0.5</sub> Co <sub>0.5</sub> Pi  | 254 | 45.75 | This work               |
| A-Ni <sub>0.8</sub> Fe <sub>0.2</sub> Pi  | 230 | 51.40 | This work               |
| A-Co <sub>0.5</sub> Fe <sub>0.5</sub> Pi  | 261 | 43.23 | This work               |
| A-Ni <sub>0.5</sub> Cu <sub>0.5</sub> Pi  | 310 | 55.97 | This work               |
| A-Co <sub>0.5</sub> Cu <sub>0.5</sub> Pi  | 303 | 62.18 | This work               |
| A-Co <sub>0.5</sub> Mn <sub>0.5</sub> Pi  | 307 | 53.47 | This work               |

## References

1. Y. Zhan, M. H. Lu, S. L. Yang, C. H. Xu, Z. L. Liu and J. Y. Lee, *Chemcatchem*, 2016, **8**, 372-379.
2. P. Bhanja, Y. Kim, B. Paul, J. J. Lin, S. M. Alshehri, T. Ahamad, Y. V. Kaneti, A. Bhaumik and Y. Yamauchi, *Chemcatchem*, 2020, **12**, 2091-2096.
3. J. D. Qi, J. F. Xie, Z. M. Wei, S. S. Lou, P. Hao, F. C. Lei and B. Tang, *Chem. Commun.*, 2020, **56**, 4575-4578.
4. H. L. Liu, H. Y. Li and X. Wang, *Small*, 2016, **12**, 2969-2974.
5. L. Yang, H. Ren, Q. H. Liang, K. N. Dinh, R. Dangol and Q. Y. Yan, *Small*, 2020, **16**, 7.
6. N. L. W. Septiani, Y. V. Kaneti, K. B. Fathoni, K. Kani, A. E. Allah, B. Yulianto, Nugraha, H. K. Dipojono, Z. A. Alothman, D. Golberg and Y. Yamauchi, *Chem. Mater.*, 2020, **32**, 7005-7018.
7. N. L. W. Septiani, Y. V. Kaneti, K. B. Fathoni, Y. N. Guo, Y. Ide, B. Yulianto, X. C. Jiang, Nugraha, H. K. Dipojono, D. Golberg and Y. Yamauchi, *J. Mater. Chem. A*, 2020, **8**, 3035-3047.
8. D. Wang, Y. J. Wang, Z. Y. Fu, Y. B. Xu, L. X. Yang, F. Wang, X. L. Guo, W. J. Sun and Z. L. Yang, *ACS Appl. Mater. Interfaces*, 2021, **13**, 34507-34517.
9. J. W. Li, W. M. Xu, D. Zhou, J. X. Luo, D. W. Zhang, P. M. Xu, L. C. Wei and D. S. Yuan, *J. Mater. Sci.*, 2018, **53**, 2077-2086.
10. J. C. Zhang, Y. Yang, Z. C. Zhang, X. B. Xu and X. Wang, *J. Mater. Chem. A*, 2014, **2**, 20182-20188.
11. Y. Zhan, M. H. Lu, S. L. Yang, Z. L. Liu and J. Y. Lee, *ChemElectroChem*, 2016, **3**, 615-621.
12. X. Cheng, J. F. Zheng, J. T. Li and X. T. Luo, *ChemElectroChem*, 2019, **6**, 2195-2200.
13. T. Guo, L. J. Zhang, S. Yun, J. D. Zhang, L. T. Kang, Y. X. Li, H. J. Li and A. B. Huang, *Mater. Res. Bull.*, 2019, **114**, 80-84.
14. R. Zhao, B. X. Ni, L. M. Wu, P. C. Sun and T. H. Chen, *Colloids Surf., A*, 2022, **635**, 9.
15. L. T. Song, T. L. Zheng, L. R. Zheng, B. Lu, H. Q. Chen, Q. G. He, W. Z. Zheng,

- Y. Hou, J. L. Lian, Y. Wu, J. Chen, Z. Z. Ye and J. G. Lu, *Appl. Catal., B*, 2022, **300**, 10.
16. S. A. Khalate, S. A. Kadam, Y. R. Ma, S. S. Pujari and U. M. Patil, *J. Alloys Compd.*, 2021, **885**, 11.
17. D. Q. Yin, Z. Y. Jin, M. M. Liu, T. T. Gao, H. Y. Yuan and D. Xiao, *Electrochim. Acta*, 2018, **260**, 420-429.
18. Y. Zhang, T. T. Qu, F. F. Bi, P. P. Hao, M. H. Li, S. Y. Chen, X. K. Guo, M. J. Xie and X. F. Guo, *ACS Sustainable Chem. Eng.*, 2018, **6**, 16859-16866.
19. X. Y. Xu, H. Liu, D. D. Li, Q. C. Wang, X. J. Zhu, D. M. Liu and X. Chen, *J. Colloid Interface Sci.*, 2023, **650**, 498-505.
